# Supplementary material for: Glomerular and Tubular Damage Markers Are Elevated in Patients With Diabetes
Source: PubMed Central journal article supplement — Diabetes Care. 2011 Mar 21;34(4):975–81. doi: 10.2337/dc10-1545 (PMC3064060; doi:10.2337/dc10-1545), 2011-03-21
Supplement: supp_dc10-1545v101545_DC101545SupplementaryData.pdf [file supp_dc10-1545v101545_DC101545SupplementaryData.pdf]

SUPPLEMENTARY DATA

**Supplementary Table 1 Plasma damage marker concentrations of patients with diabetes mellitus according to albuminuria stratum.**

|                                | <i>Normo-<br/>albuminuria</i> | <i>Micro-<br/>albuminuria</i> | <i>Macro-<br/>albuminuria</i> | <i>p-value for<br/>trend in DM</i> |
|--------------------------------|-------------------------------|-------------------------------|-------------------------------|------------------------------------|
| <u><i>Glomerular</i></u>       |                               |                               |                               |                                    |
| - IgG (mg/ml)                  | 6.3 (4.4-40.7)                | 21.8 (5.2-39.9)               | 7.0 (2.2-32.2)                | 0.80                               |
| <u><i>Proximal tubular</i></u> |                               |                               |                               |                                    |
| - KIM-1 (ng/ml))               | 0.05 (0.0-0.32)               | 0.16 (0.07-0.30)              | 0.19 (0.07-0.28)              | 0.88                               |
| - NAG (U/L)                    | 31.8 (23.3-39.7)              | 32.6 (24.5-48.2)              | 23.2 (18.5-35.3)              | 0.19                               |
| - NGAL (ng/ml)                 | 197 (117-323)                 | 188 (131-288)                 | 245 (193-430)                 | 0.52                               |
| - CysC (mg/L)                  | 0.79 (0.68-0.89)              | 1.00 (0.80-1.17)              | 1.30 (1.17-1.44)              | <0.001                             |
| <u><i>Distal tubular</i></u>   |                               |                               |                               |                                    |
| - H-FABP (ng/ml)               | 0.84 (0.36-2.63)              | 1.11 (0.00-2.53)              | 1.94 (0.47-17.08)             | 0.001                              |

Values are given as median (25<sup>th</sup>-75<sup>th</sup> percentile)
